# Supplementary material
Source: PubMed Central journal article supplement (PMC154232)

## SUPPLEMENTARY MATERIAL

### **Wnt-1 upregulates Wnt-targets *Cyclin D1*, *Lef-1* and *Tcf-1* mRNA in 293 cells**

**A**, Results of quantitative real-time PCR performed with cDNA generated from 293 cells stimulated by feeder cells stably producing Wnt-1 protein (Rat2-Wnt-1/Const) or by control Rat2 cells are shown. The 293 and feeder cells were co-cultivated for the indicated period of time, then harvested, and random primed cDNA was prepared from total RNA.

**B**, CtBP1 overexpression has no obvious effect on the levels of *Cyclin-1*, *Lef-1*, *Tcf-1*, *CtBP1*, and *CtBP2* RNA in Wnt-1-stimulated 293 cells. 293-EGFP-CtBP1/Dox cells were co-cultivated with Rat2-Wnt-1/Const or control Rat2 fibroblasts as a negative control for 15 hours in the presence (EGFP-CtBP1 repressed) or absence (EGFP-CtBP1 over-expressed) of Doxycycline (1 µg/ml). The random primed cDNAs generated from the relevant RNAs were analysed. The picture shows the relative abundance of *Cyclin D1*, *Lef-1*, *Tcf-1*, *CtBP1* and *CtBP2* mRNAs in Wnt-1-stimulated 293-EGFP-CtBP1/Dox cells versus control 293-EGFP-CtBP1/Dox in two situations: (1) when EGFP-CtBP1 is expressed (-Dox) or (2) repressed (+Dox).

The results were analyzed using the LightCycler 5.1 software package, and the values of a representative experiment are shown. The relative abundance of *Cyclin-1*, *Lef-1*, *Tcf-1*, *CtBP1* and *CtBP2* mRNA in Wnt-1-stimulated versus control cells was derived from the average CT values of each triplicate after normalizing to the levels of *SDHA* cDNA.

Figure 6 -supplementary data

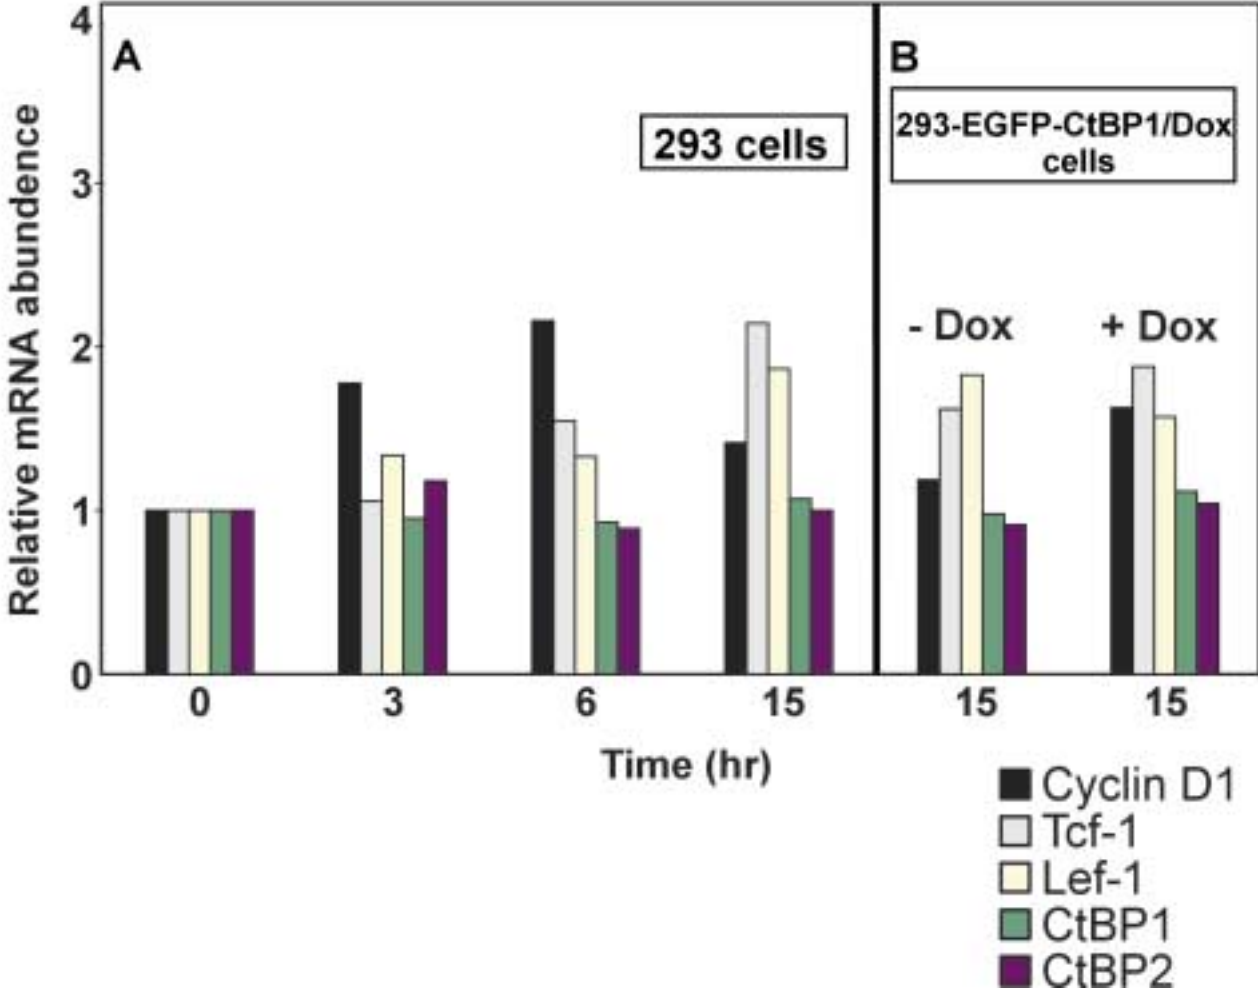

Supplement: nar_31_9_2369__1.pdf [file nar_31_9_2369__1.pdf]
